# Supplementary material for: Role of the upper airway microbiota in respiratory virus and bacterial pathobiont dynamics in the first year of life
Source: Springer Nature journal article supplement (doi:10.1038/s41467-025-60552-4), 2025-06-04

## SUPPLEMENTARY INFORMATION

### Role of the upper airway microbiota in respiratory virus and bacterial pathobiont dynamics in the first year of life

**Authors:** Matthew S. Kelly, MD, MPH,<sup>1,2,3,\*</sup> Pixu Shi, PhD,<sup>4</sup> Sifelane C. Boiditswe, BNSc,<sup>1</sup> Emily Qin, BS,<sup>4</sup> Andrew P. Steenhoff, MBBCh,<sup>1,5,6</sup> Tiny Mazhani, MD,<sup>7</sup> Mohamed Z. Patel, MBBCh,<sup>7</sup> Coleen K. Cunningham, MD,<sup>8</sup> John F. Rawls, PhD,<sup>3</sup> Kathy Luinstra, HBSc,<sup>9</sup> Jodi Gilchrist, MSc,<sup>9</sup> Julia Maciejewski, MSc,<sup>9</sup> Jillian H. Hurst, PhD,<sup>2</sup> Patrick C. Seed, MD, PhD,<sup>10</sup> David Bulir, MD, PhD,<sup>11</sup> Marek Smieja, MD, PhD<sup>9,12</sup>

**Affiliations:** <sup>1</sup>Botswana-University of Pennsylvania Partnership, Gaborone, Botswana; <sup>2</sup>Division of Pediatric Infectious Diseases, Duke University, Durham, North Carolina, United States; <sup>3</sup>Department of Molecular Genetics and Microbiology, Duke University, Durham, North Carolina, United States; <sup>4</sup>Department of Biostatistics and Bioinformatics, Duke University, Durham, North Carolina, United States; <sup>5</sup>Global Health Center, Children's Hospital of Philadelphia, Philadelphia, Pennsylvania, United States; <sup>6</sup>Division of Pediatric Infectious Diseases, Children's Hospital of Philadelphia, Philadelphia, Pennsylvania, United States; <sup>7</sup>University of Botswana School of Medicine, Gaborone, Botswana; <sup>8</sup>Division of Pediatric Infectious Diseases, University of California, Irvine, Orange, California, United States; <sup>9</sup>Infectious Disease Research Group, Research Institute of St. Joe's Hamilton, Hamilton, Ontario, Canada; <sup>10</sup>Department of Pediatrics, Feinberg School of Medicine, Northwestern University, Chicago, Illinois, United States; <sup>11</sup>Department of Chemical Engineering, McMaster University, Hamilton, Ontario, Canada; <sup>12</sup>Department of Pathology and Molecular Medicine, McMaster University, Hamilton, Ontario, Canada; \*corresponding author: [mkelly3@uams.edu](mailto:mkelly3@uams.edu)

**Supplementary Table 1.** Associations between respiratory virus infections and acute respiratory infection symptoms

|                             | Sample prevalence |       | ARI symptoms |     |
|-----------------------------|-------------------|-------|--------------|-----|
|                             | n                 | (%)   | n            | (%) |
| Adenovirus                  | 65                | 2.7%  | 23           | 35% |
| Human metapneumovirus       | 17                | 0.7%  | 13           | 76% |
| Influenza viruses           | 14                | 0.6%  | 11           | 79% |
| A                           | 13                | 0.5%  | 11           | 85% |
| B                           | 1                 | <0.1% | 0            | 0%  |
| Parainfluenza viruses       | 39                | 1.6%  | 23           | 59% |
| Type 1                      | 8                 | 0.4%  | 2            | 25% |
| Type 2                      | 4                 | 0.2%  | 1            | 25% |
| Type 3                      | 27                | 1.1%  | 20           | 74% |
| Rhinovirus/enterovirus      | 507               | 21.4% | 209          | 41% |
| Respiratory syncytial virus | 44                | 1.9%  | 32           | 73% |
| SARS-CoV-2                  | 1                 | <0.1% | 0            | 0%  |
| More than one virus         | 48                | 2.0%  | 23           | 48% |
| No viruses                  | 1733              | 73.1% | 308          | 18% |

ARI, acute respiratory infection; SARS-CoV-2, severe acute respiratory syndrome coronavirus 2

**Supplementary Table 2.** Associations between symptomatic and asymptomatic respiratory virus detections and the odds of acquiring bacterial pathobionts during infancy

|                                   |                                 | Intervals<br>(n) | Colonization<br>frequency<br>(n, %) |     | Odds<br>ratio | 95%<br>confidence<br>interval | p       |
|-----------------------------------|---------------------------------|------------------|-------------------------------------|-----|---------------|-------------------------------|---------|
| <i>H. influenzae</i> acquisition  |                                 |                  |                                     |     |               |                               |         |
|                                   | Virus detected, ARI symptoms    | 205              | 59                                  | 29% | 1.84          | (1.24 - 2.73)                 | 0.003   |
|                                   | Virus detected, no ARI symptoms | 226              | 51                                  | 23% | 1.13          | (0.76 - 1.70)                 | 0.54    |
|                                   | No viruses detected             | 1081             | 180                                 | 17% | Ref           | -                             | -       |
| <i>M. catarrhalis</i> acquisition |                                 |                  |                                     |     |               |                               |         |
|                                   | Virus detected, ARI symptoms    | 104              | 54                                  | 52% | 1.72          | (1.08 - 2.76)                 | 0.02    |
|                                   | Virus detected, no ARI symptoms | 138              | 55                                  | 40% | 1.10          | (0.72 - 1.68)                 | 0.67    |
|                                   | No viruses detected             | 729              | 256                                 | 35% | Ref           | -                             | -       |
| <i>S. aureus</i> acquisition      |                                 |                  |                                     |     |               |                               |         |
|                                   | Virus detected, ARI symptoms    | 233              | 14                                  | 6%  | 0.48          | (0.26 - 0.89)                 | 0.02    |
|                                   | Virus detected, no ARI symptoms | 279              | 16                                  | 6%  | 0.42          | (0.24 - 0.76)                 | 0.004   |
|                                   | No viruses detected             | 1177             | 170                                 | 14% | Ref           | -                             | -       |
| <i>S. pneumoniae</i> acquisition  |                                 |                  |                                     |     |               |                               |         |
|                                   | Virus detected, ARI symptoms    | 133              | 69                                  | 52% | 2.76          | (1.80 - 4.22)                 | <0.0001 |
|                                   | Virus detected, no ARI symptoms | 151              | 51                                  | 34% | 1.25          | (0.82 - 1.90)                 | 0.30    |
|                                   | No viruses detected             | 810              | 212                                 | 26% | Ref           | -                             | -       |

Odds ratios, 95% confidence intervals, and two-sided p values were estimated from mixed effect logistic regression models adjusted for age, sex, low birth weight (<2500g), maternal HIV infection, location of residence, number of children under 5 years of age in the household, season, breastfeeding, receipt of antibiotics since the prior study visit, and 13-valent pneumococcal conjugate vaccine doses (for *S. pneumoniae* only). The p value for the odds of *S. pneumoniae* acquisition associated with respiratory virus detection with ARI symptoms, compared to no virus detection, was  $2.95 \times 10^{-6}$ . No adjustments were made for multiple comparisons. ARI, acute respiratory infection, Ref, reference

**Supplementary Table 3.** Associations between respiratory virus detections and the odds of acquiring bacterial pathobionts during infancy

|                                   |                             | Intervals<br>(n) | Colonization<br>frequency<br>(n, %) |     | Odds<br>ratio | 95%<br>confidence<br>interval | p      |
|-----------------------------------|-----------------------------|------------------|-------------------------------------|-----|---------------|-------------------------------|--------|
| <i>H. influenzae</i> acquisition  |                             |                  |                                     |     |               |                               |        |
|                                   | Rhinovirus/enterovirus only | 324              | 79                                  | 24% | 1.38          | (0.98 - 1.94)                 | 0.07   |
|                                   | Other viruses detected      | 107              | 31                                  | 29% | 1.65          | (0.98 - 2.76)                 | 0.06   |
|                                   | No viruses detected         | 1081             | 180                                 | 17% | Ref           | -                             | -      |
| <i>M. catarrhalis</i> acquisition |                             |                  |                                     |     |               |                               |        |
|                                   | Rhinovirus/enterovirus only | 187              | 79                                  | 42% | 1.22          | (0.84 - 1.77)                 | 0.29   |
|                                   | Other viruses detected      | 55               | 30                                  | 55% | 1.82          | (0.96 - 3.45)                 | 0.06   |
|                                   | No viruses detected         | 729              | 256                                 | 35% | Ref           | -                             | -      |
| <i>S. aureus</i> acquisition      |                             |                  |                                     |     |               |                               |        |
|                                   | Rhinovirus/enterovirus only | 382              | 24                                  | 6%  | 0.46          | (0.28 - 0.75)                 | 0.002  |
|                                   | Other viruses detected      | 130              | 6                                   | 5%  | 0.39          | (0.15 - 1.00)                 | 0.0499 |
|                                   | No viruses detected         | 1177             | 170                                 | 14% | Ref           | -                             | -      |
| <i>S. pneumoniae</i> acquisition  |                             |                  |                                     |     |               |                               |        |
|                                   | Rhinovirus/enterovirus only | 219              | 92                                  | 42% | 1.87          | (1.32 - 2.64)                 | 0.0005 |
|                                   | Other viruses detected      | 65               | 28                                  | 43% | 1.73          | (0.95 - 3.13)                 | 0.07   |
|                                   | No viruses detected         | 810              | 212                                 | 26% | Ref           | -                             | -      |

Odds ratios, 95% confidence intervals, and two-sided p values were estimated from mixed effect logistic regression models adjusted for age, sex, low birth weight (<2500g), maternal HIV infection, location of residence, number of children under 5 years of age in the household, season, breastfeeding, receipt of antibiotics since the prior study visit, and 13-valent pneumococcal conjugate vaccine doses (for *S. pneumoniae* only). No adjustments were made for multiple comparisons. Ref, reference

**Supplementary Table 4.** Targets for multiplex PCR assay for the detection of bacterial pathogens

| Species                         | Primer and probe sequences                                                                                                              |
|---------------------------------|-----------------------------------------------------------------------------------------------------------------------------------------|
| <i>Haemophilus influenzae</i>   | F, 5' d CCAATCACATCATCTGCAACTA 3'<br>R, 5' d GCGTGGCTTGATGGATTG 3'<br>Probe, 5' d CAL Fluor Red 610-TGGTTTTTCGCCTGACTCACTAAAAG-BHQ-2 3' |
| <i>Moraxella catarrhalis</i>    | F, 5' d GGTAAAAAGGTTGGAAAAACC 3'<br>R, 5' d CTGACGCTAAGATTAGGATTGA 3'<br>Probe, 5' d Quasar 670-CCAAGCTTTGGGGTGATTTATGATG-BHQ-2 3'      |
| <i>Staphylococcus aureus</i>    | F, 5' d TGMATATTTTACCTAGTAAAGAAGG 3'<br>R, 5' d ATACRTACATTCAAATCAGCTTC 3'<br>Probe, 5' d HEX-TGTACGAAGAATTRGAAAGAACGATTGAG-BHQ-1 3'    |
| <i>Streptococcus pneumoniae</i> | F, 5' d AAGACTTCAATAAGCCTTCTACG 3'<br>R, 5' d GAGAAGGTGAGRAGTCAAGAAG 3'<br>Probe, 5' d FAM-TCTTCAGACGAATTTTCTGTCATAGGAACA-BHQ-1 3'      |

50

51

52 **Supplementary Figure 1. Comparison of upper respiratory tract microbiota types identified using k-medoids and k-means clustering.** **a.**  
 53 NMDS plot depicts microbiota types identified using k-medoids clustering on Bray-Curtis distances. Ellipses define the regions containing 80%  
 54 of all samples that can be drawn from the underlying multivariate t distribution. **b.** Relative abundances of highly abundant genera in infant  
 55 nasopharyngeal samples by k-medoids microbiota type. **c.** Classification of microbiota types using k-means clustering on Euclidean distances by  
 56 k-medoids microbiota type. **d.** NMDS plot depicts microbiota types identified using k-means clustering on Euclidean distances. Ellipses define  
 57 the regions containing 80% of all samples that can be drawn from the underlying multivariate t distribution. **e.** Relative abundances of highly  
 58 abundant genera in infant nasopharyngeal samples by k-means microbiota type. The composition of the microbiota types identified by k-means  
 59 clustering is similar to the composition of the types identified by k-medoids clustering. **f.** Relative abundances of microbiota types identified  
 60 using k-medoids clustering on Bray-Curtis distances by k-means microbiota type. Overall, 1,943 of 2,235 (87%) samples with URT microbiota  
 61 data had the same microbiota type classification using k-medoids or k-means clustering. URT microbiota types are named according to the  
 62 bacterial genus or genera with the highest mean relative abundance: CD, *Corynebacterium/Dolosigranulum*; CDM, *Corynebacterium/Dolosigranulum/Moraxella*;  
 63 *Corynebacterium*; HAE, *Haemophilus*; MOR, *Moraxella*; STA, *Staphylococcus*; STR, *Streptococcus*; and OTH, “other.” Source data are provided as a Source Data file. (ASV, amplicon sequence variant; NMDS, non-metric  
 64 multidimensional scaling)  
 65

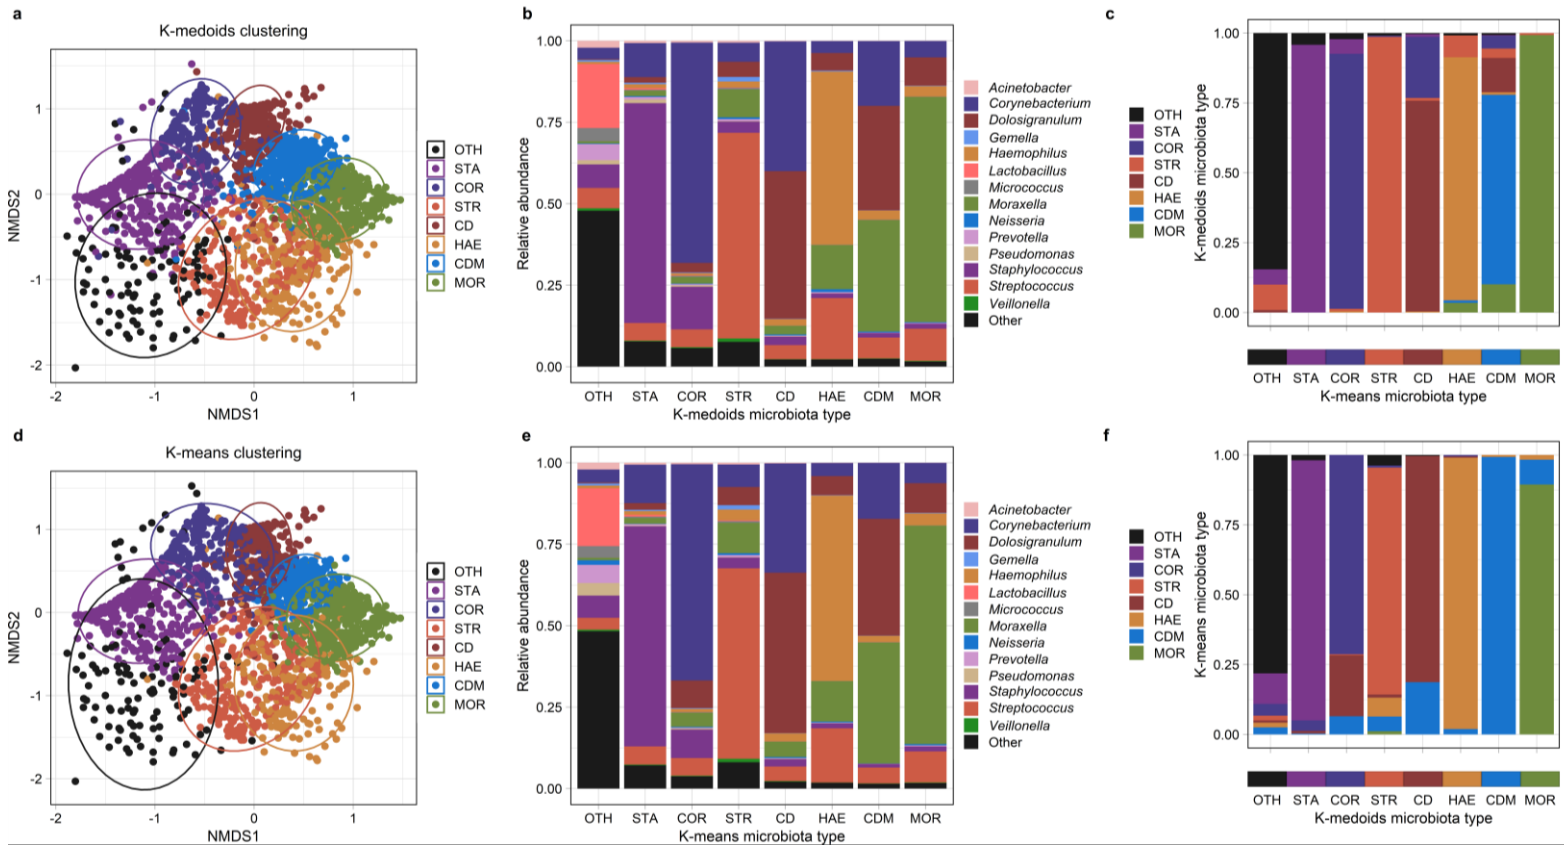

68 **Supplementary Figure 2. Shifts in upper respiratory microbiota community states associated with the acquisition of bacterial**  
69 **pathobionts.** Alluvial diagrams depict transitions from microbiota types associated with the acquisition of (a.) *H. influenzae*, (b.) *M. catarrhalis*,  
70 (c.) *S. aureus*, and (d.) *S. pneumoniae*. Microbiota types dominated by the genus corresponding to the bacterial pathobiont are opaque, while  
71 other microbiota types are depicted as semi-transparent. URT microbiota types are named according to the bacterial genus or genera with the  
72 highest mean relative abundance: CD, *Corynebacterium/Dolosigranulum*; CDM, *Corynebacterium/Dolosigranulum/Moraxella*; COR,  
73 *Corynebacterium*; HAE, *Haemophilus*; MOR, *Moraxella*; STA, *Staphylococcus*; STR, *Streptococcus*; and OTH, “other.” Source data are  
74 provided as a Source Data file.

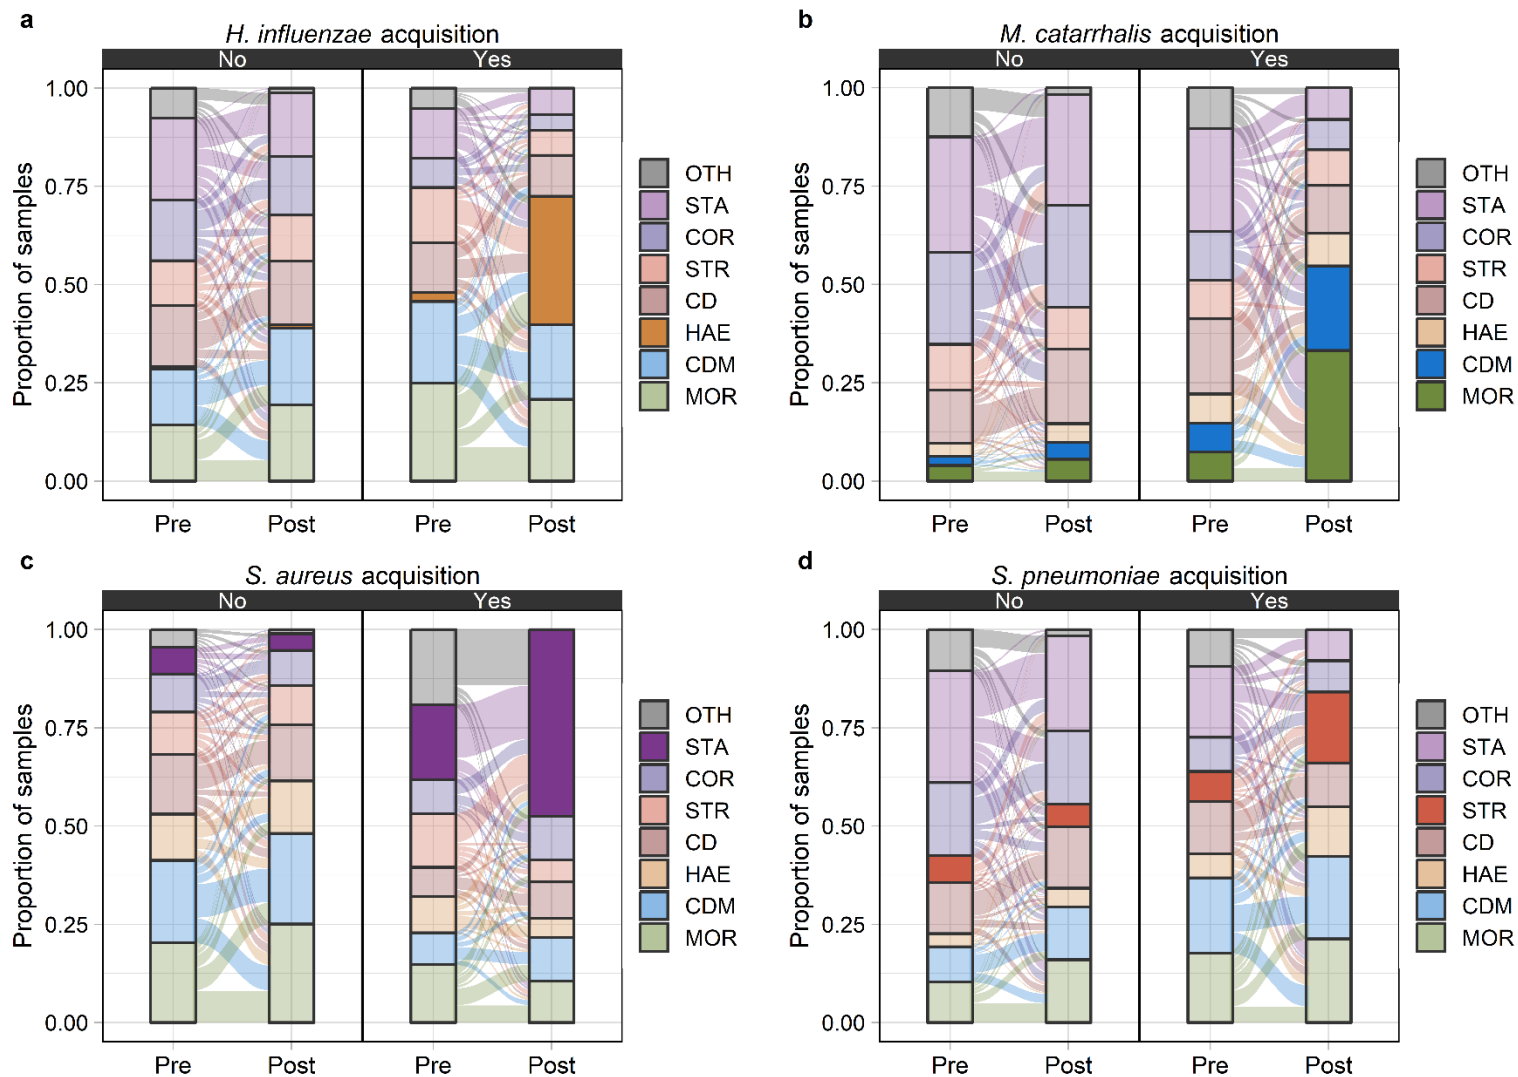

76 **Supplementary Figure 3. Identification of ASVs containing bacterial respiratory pathobionts. a.** Violin and box plots depict the relative
 77 abundances of specific ASVs within the upper respiratory microbiota by pathobiont colonization status. The line within each box indicates the
 78 median, box edges represent the 25th and 75th percentiles, and whiskers extend to 1.5 times the interquartile range. Based on BLAST searches,
 79 higher relative abundances of several ASVs potentially containing a pathobiont were observed among children identified as being colonized with
 80 that pathobiont by PCR, suggesting that these ASVs contain that pathobiont species. Specifically, higher relative abundances of ASVs 7 and 8
 81 were observed with *H. influenzae* colonization, higher relative abundances of ASV1 were observed with *M. catarrhalis* colonization, higher
 82 relative abundances of ASV3 were observed with *S. aureus* colonization, and higher relative abundances of ASV5 were observed with *S. pneumoniae*
 83 colonization. In contrast, lower relative abundances of ASV15 were observed in children with *S. pneumoniae* colonization, consistent
 84 with this ASV being classified as other streptococcal species using BLAST. Wilcoxon rank-sum tests were used to estimate p values for
 85 differences in ASV relative abundances by pathobiont colonization status. **b.** Scatterplots show the correlation between log-transformed
 86 pneumococcal colonization density and the relative abundances of specific ASVs within the upper respiratory microbiota. Spearman's rank
 87 correlation coefficients and associated p value are depicted. A strong positive correlation ( $\rho=0.83$ ) was observed between the pneumococcal
 88 colonization density by PCR and the relative abundance of ASV5, providing further evidence that this ASV contains the pathobiont *S. pneumoniae*.
 89 A weak negative correlation ( $\rho=-0.22$ ) was observed between the colonization density and the relative abundance of ASV15,
 90 consistent with this ASV not containing *S. pneumoniae*. Source data are provided as a Source Data file. (ASV, amplicon sequence variant)

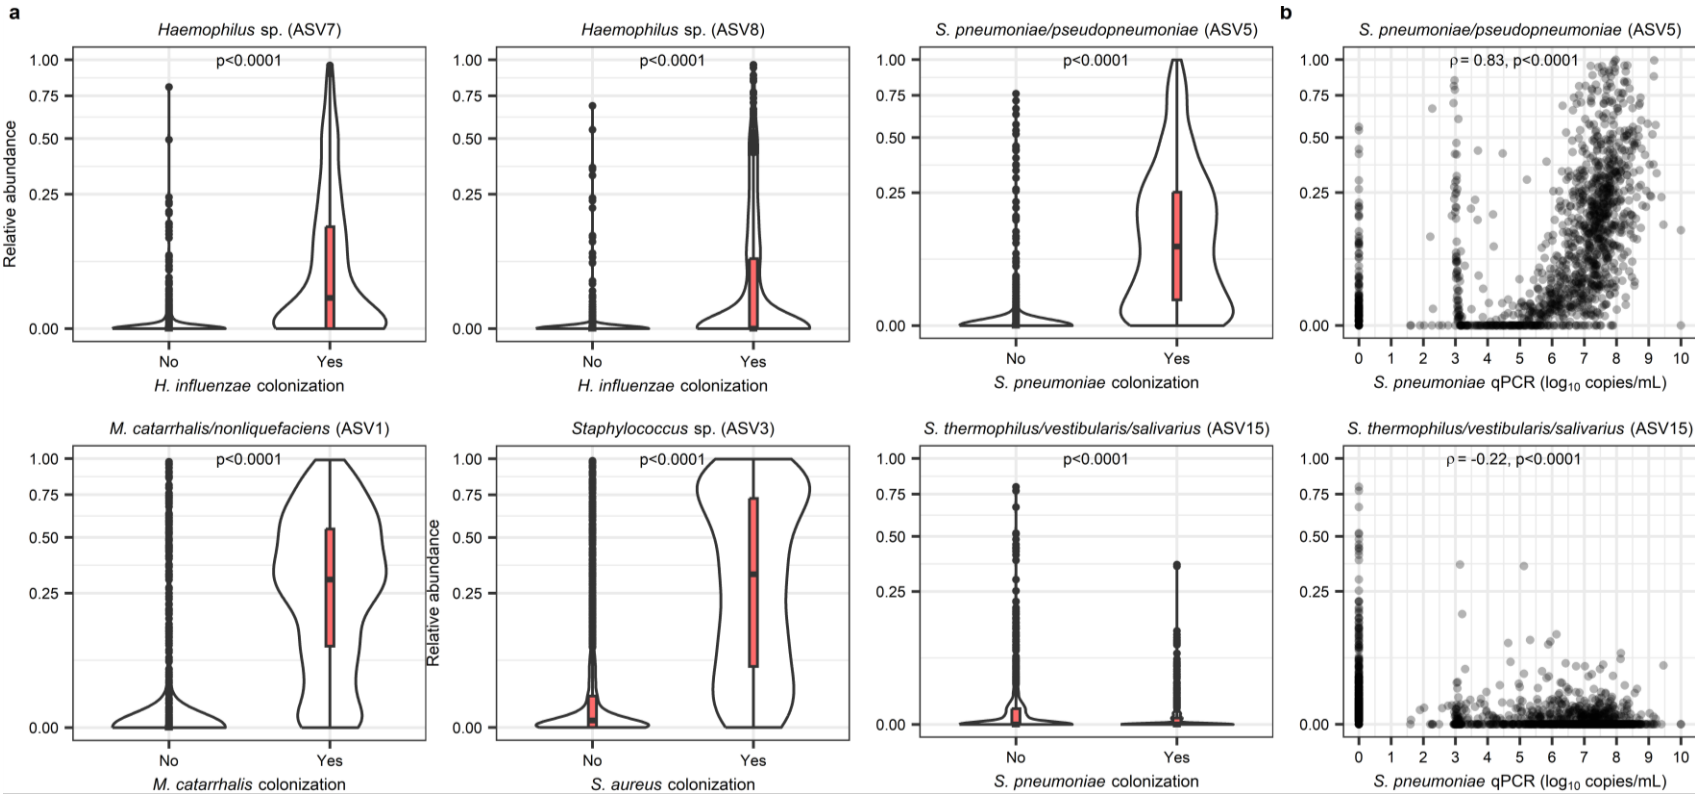

Supplement: MOESM1 [file 41467_2025_60552_MOESM1_ESM.pdf]
